# Supplementary material for: First Evidence of the Toxin Domoic Acid in Antarctic Diatom Species
Source: PubMed Central journal article supplement (PMC7912347; doi:10.3390/toxins13020093), 2021-01-26
Supplement: toxins-13-00093-s001.pdf [file toxins-13-00093-s001.pdf]

## Supplementary Materials: First Evidence of the Toxin Domoic Acid in Antarctic Diatom Species

Anna J. Olesen, Anneliese Leithoff, Andreas Altenburger, Bernd Krock, Bánk Beszteri, Sarah Lena Eggers and Nina Lundholm

**Table S1.** Detailed overview of the strains included in this study. Date of isolation, location for specific water sample, temperature, salinity and nutrient levels when available.

| Station | Strain ID | isolation date | Lat.    | Long.   | Temp. (°C) | Salinity | Si (μmol L <sup>-1</sup> ) | PO <sub>4</sub> (μmol L <sup>-1</sup> ) | NO <sub>3</sub> (μmol L <sup>-1</sup> ) |
|---------|-----------|----------------|---------|---------|------------|----------|----------------------------|-----------------------------------------|-----------------------------------------|
| 3       | M3-6      | 26/12/2016     | 51.99°S | 2.10°E  | 2.46       | 33.77    | 25.95                      | 1.58                                    | 0.24                                    |
| 4       | M4-4      | 26/12/2016     | 55.88°S | 1.06°E  | 1.7        | 33.79    | 52.88                      | 1.22                                    | 0.08                                    |
| 5       | M5-3      | 27/12/2016     | 59.05°S | 0.08°E  | N/A        | N/A      | 55.89                      | 1.14                                    | 0.13                                    |
|         | M5-4      | 27/12/2016     |         |         |            |          |                            |                                         |                                         |
|         | M5-7      | 30/12/2016     |         |         |            |          |                            |                                         |                                         |
|         | M5-8      | 30/12/2016     |         |         |            |          |                            |                                         |                                         |
| 11      | M11-04•   | 28/12/2016     | 66.54°S | 0.01°E  | 2.86       | 34.14    |                            |                                         |                                         |
|         | 11-8      | 28/12/2016     |         |         |            |          |                            |                                         |                                         |
|         | 11-11     | 28/12/2016     |         |         |            |          |                            |                                         |                                         |
| 22      | 22-35     | 31/12/2018     | 59.3°S  | 0.6°E   | -0.33      | 33.98    | 58.25                      | 1.62                                    | 24.63                                   |
| 31      | 31-7•     | 04/01/2019     | 69.24°S | 0.0°    | -1.58      | 34.10    | 120.65                     | 2.35                                    | 120.65                                  |
|         | 31-11     | 04/01/2019     |         |         |            |          |                            |                                         |                                         |
| 33      | 33-7      | 05/01/2019     | 69°S    | 6.59°E  |            |          |                            |                                         |                                         |
| 35      | 35-11     | 08/01/2019     | 69.3°S  | 17.23°E | -1.35      | 34.14    | 66.72                      | 1.75                                    | 25.97                                   |
|         | 35-12•    | 08/01/2019     |         |         |            |          |                            |                                         |                                         |

Strains marked with • and orange contained DA and Iso-DA C.
